# Supplementary material for: Magnetic Ni and Ni/Pt hollow nanospheres and their catalytic activities for hydrolysis of ammonia borane
Source: Royal Society of Chemistry journal article supplement (doi:10.1039/c4ta03949a), 2014-01-01
Supplement: c4ta03949a1.pdf [file c4ta03949a1.pdf]

## Supporting Information

### Magnetic Ni and Ni/Pt hollow nanospheres and their catalytic activities for hydrolysis of ammonia borane

Wenliang Jiao, Xiaopeng Hu, Hao Ren, Pengfei Xu, Ranbo Yu\*, Jun Chen, and Xianran Xing

Department of Physical Chemistry, University of Science and Technology Beijing, Beijing 100083, PR China.

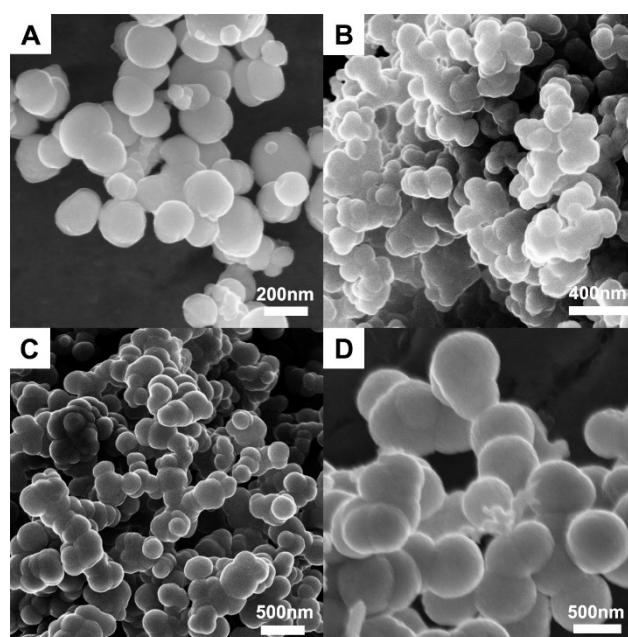

Figure S1. SEM images of the as-synthesized nickel hollow spheres: (A) ET/EN=1:9; (B) ET/EN=3:7; (C) ET/EN=4:6; (D) ET/EN=5:5.

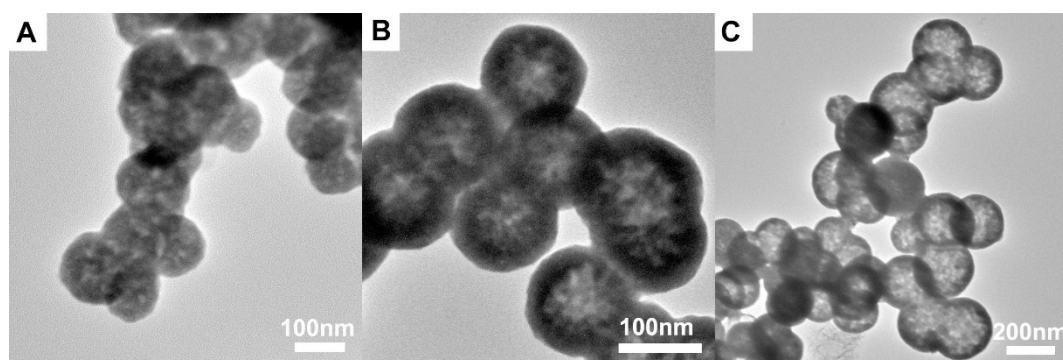

Figure S2. TEM images of as-synthesized nickel hollow spheres at different reaction stage: (A) incipient stage; (B) intermediate stage; (C) later stage.

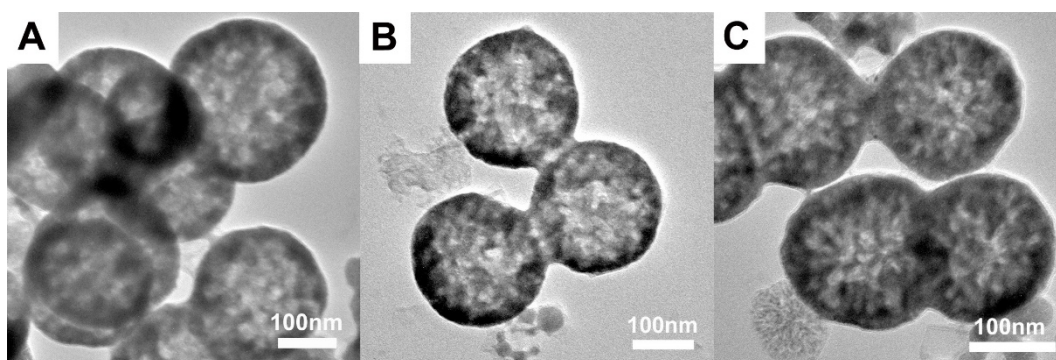

Figure S3. TEM images of as-synthesized Ni/Pt hollow spheres of different ratios: (A) Ni/Pt=95:5; (B) Ni/Pt=90:10; (C) Ni/Pt=95:15.

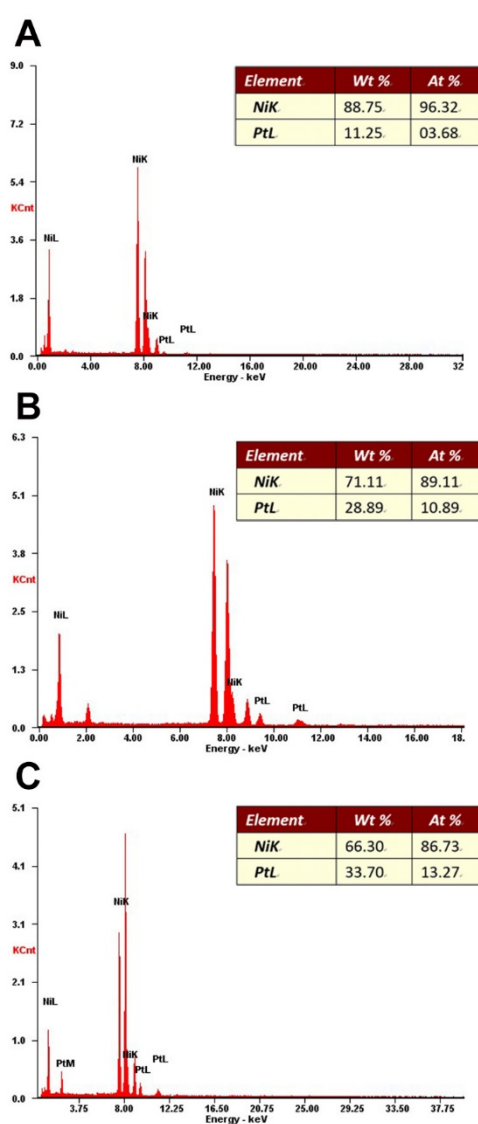

Figure S4. EDAX test of the as-synthesized Ni/Pt hollow spheres with different molar ratios: (A) Ni/Pt=95:5; (B) Ni/Pt=90:10; (C) Ni/Pt=85:15.

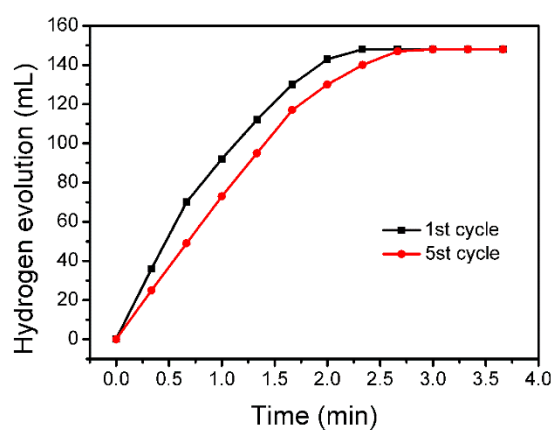

Figure S5. Reusability of the as-synthesized Ni/Pt hollow spheres.

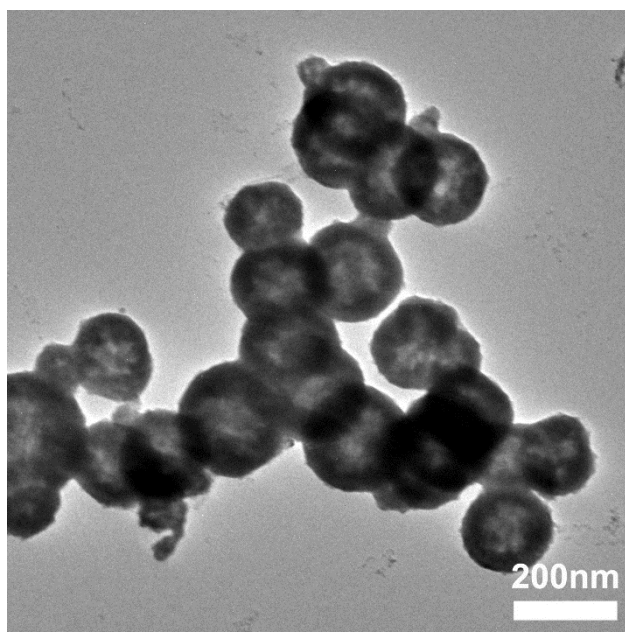

Figure S6. TEM image of as-synthesized Ni/Pt hollow bimetallic spheres after catalytic reaction.

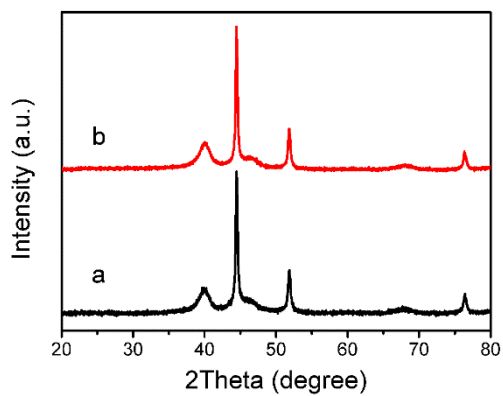

Figure S7. XRD patterns of the as-synthesized Ni/Pt hollow bimetallic nanospheres. a) before the catalytic reaction, b) after the catalytic reaction.
